# Supplementary material for: Genome-Wide RNAi Screen Identifies Broadly-Acting Host Factors That Inhibit Arbovirus Infection
Source: PubMed Central journal article supplement (PMC3923753; doi:10.1371/journal.ppat.1003914), 2014-02-13
Supplement: ppat.1003914.s001.pdf [file ppat.1003914.s001.pdf]

**Table S1. Complexes identified in the screen.**

| <b>Complex/Process</b>                                  | <b>Genes primary screen</b>                                                                                         | <b>Genes validated</b>                                          |
|---------------------------------------------------------|---------------------------------------------------------------------------------------------------------------------|-----------------------------------------------------------------|
| Vacuolar-type H <sup>+</sup> -ATPase                    | Vha100-1, Vha100-2, <b>Vha55</b> , VhaPPA1-1, <b>VhaAC39</b> , Vha13, Vha14, Vha26, <b>VhaSFD, VhaAC45, VhaM8.9</b> | VhaAC45, VhaSFD, VhaM8.9, Vha55, VhaAC39                        |
| Signal Recognition complex/<br>Signal peptidase complex | <b>Srp19, Srp54K</b> , Srp9, Srp14, <b>SrpBeta, Srp72, Spase25</b> , Spase22-23                                     | SrpBeta, Srp72, Srp19, Srp54K, Spase25                          |
| Translation initiation                                  | <b>eIF-S9, eIF5B, eIF2B-beta</b> , eIF2B-epsilon, <b>eIF4G, eIF2B-gamma, eIF-4B, CG17737</b>                        | eIF2B-gamma, eIF-4B, CG17737, eIF2B-Beta, eIF3-S9, eIF4G, eIF5B |
| Mediator complex                                        | <b>MED4, MED7, MED8</b> , MED10, MED14, MED17, MED22                                                                | MED8, MED4, MED7                                                |
| Arp2/3 complex                                          | Arpc3B, Arp66B, <b>Arp14D</b>                                                                                       | Arp14D                                                          |
| Tafs                                                    | <b>Taf6, Taf5</b> , Taf12                                                                                           | Taf5, Taf6                                                      |
