# Supplementary material for: Genome-Wide RNAi Screen Identifies Broadly-Acting Host Factors That Inhibit Arbovirus Infection
Source: PubMed Central journal article supplement (PMC3923753; doi:10.1371/journal.ppat.1003914), 2014-02-13
Supplement: ppat.1003914.s002.pdf [file ppat.1003914.s002.pdf]

**Table S2. Genes identified and validated in the genome-wide RNAi screen against WNV.**

| gene                 | CG ID          | Human Homolog | Mosquito Ortholog         | Primary Avg z-score inf | WNV secondary Avg z-score inf |
|----------------------|----------------|---------------|---------------------------|-------------------------|-------------------------------|
| CG17737              | CG17737        | EIF1          | AgaP_AGAP006459           | 3.15                    | 4.57                          |
| Taf6                 | CG32211        | TAF6          | AgaP_AGAP004254           | 3.08                    | 2.94                          |
| CG32113              | CG32113        | VPS13D        | AgaP_AGAP009780           | 2.98                    | 2.34                          |
| skd                  | CG9936         | MED13L        | AgaP_AGAP006436           | 2.86                    | 3.07                          |
| yellow-c   l(2)35Bg  | CG4182         |               | AgaP_AGAP010280           | 2.85                    | 2.18                          |
| CrebA                | CG7450         |               | AgaP_AGAP011038           | 2.84                    | 1.37                          |
| skpA                 | CG16983        | LOC100506333  | AgaP_AGAP008719           | 2.74                    | 1.44                          |
| CG33123              | CG33123        | LARS          | AgaP_AGAP008297           | 2.73                    | 2.77                          |
| Aats-tyr             | CG4561         | YARS          | AgaP_AGAP003003           | 2.72                    | 1.88                          |
| CG1789               | CG1789         | UTP11L        | AgaP_AGAP004336           | 2.71                    | 3.11                          |
| pont                 | CG4003         | RUVBL1        | ENSANGG00000022263        | 2.62                    | 2.53                          |
| CG14516              | CG14516        |               | AgaP_ENSANGG00000018759   | 2.60                    | 2.49                          |
| PPP4R2r              | CG2890         | PPP4R2        | ENSANGG00000019508        | 2.55                    | 2.41                          |
| CG3224               | CG3224         | ZNF593        | AgaP_AGAP003698           | 2.52                    | 1.76                          |
| CG7394               | CG7394         | DNAJC19       | AgaP_AGAP003533           | 2.51                    | 2.14                          |
| CG17119              | CG17119        | CTNS          | AgaP_AGAP004115           | 2.50                    | 2.86                          |
| CG9053               | CG9053         | TMED5         | AgaP_AGAP001505           | 2.49                    | 3.02                          |
| MED8                 | CG13867        | MED8          | AgaP_AGAP005909           | 2.49                    | 2.23                          |
| CG3876               | CG3876         | FRAG1         | AgaP_AGAP007869           | 2.45                    | 1.67                          |
| CG10158              | CG10158        | FGFR1OP2      | AgaP_AGAP012118           | 2.40                    | 2.81                          |
| phl                  | CG2845         | BRAF          | AgaP_AGAP004699           | 2.38                    | 2.27                          |
| CG6495               | CG6495         |               | AgaP_AGAP007887           | 2.37                    | 1.97                          |
| Rab-RP3              | CG7062         | RAB43         | AgaP_AGAP007096           | 2.35                    | 2.83                          |
| cn                   | CG1555         | KMO           | KMO_ANOGA                 | 2.35                    | 1.71                          |
| CG3335               | CG3335         | RBM19         | AgaP_AGAP005249           | 2.34                    | 3.13                          |
| CG11526              | CG11526        | FAM40A        | AgaP_AGAP007902           | 2.32                    | 4.07                          |
| CG10646              | CG10646        | TSSC1         | AgaP_AGAP006239           | 2.32                    | 2.09                          |
| CG5326               | CG5326         |               | AgaP_AGAP011812           | 2.31                    | 3.56                          |
| Taf5                 | CG7704         | TAF5          | AgaP_AGAP011678           | 2.30                    | 3.38                          |
| CG6094               | CG6094         | ICT1          | AgaP_AGAP008425           | 2.29                    | 2.76                          |
| Axn                  | CG7926         | AXIN2         | AgaP_AGAP002123           | 2.24                    | 3.12                          |
| Spt20                | CG17689        |               | AgaP_AGAP012403           | 2.23                    | 2.64                          |
| emb                  | CG13387        | XPO1          | AgaP_AGAP009929           | 2.17                    | 2.90                          |
| CG11920              | CG11920        | IMP4          | AgaP_AGAP003890           | 2.15                    | 3.23                          |
| l(2)k07824           | CG7989         | UTP18         | AgaP_AGAP009046           | 2.14                    | 3.73                          |
| CG11837              | CG11837        | DIMT1L        | AgaP_AGAP004465           | 2.14                    | 1.58                          |
| cnk                  | CG6556         |               | AgaP_AGAP009167           | 2.12                    | 2.25                          |
| CG7115               | CG7115         | PPM1L         | ENSANGG00000018281        | 2.08                    | 3.23                          |
| eIF2B-gamma          | CG8190         | EIF2B3        | AgaP_AGAP005210           | 2.06                    | 2.03                          |
| <b>eIF3-S9</b>       | <b>CG4878</b>  | <b>EIF3B</b>  | <b>EIF3B_ANOGA</b>        | <b>2.27</b>             | <b>Fig S1F</b>                |
| <b>eIF5B</b>         | <b>CG10840</b> | <b>EIF5B</b>  | <b>AgaP_AGAP004824</b>    | <b>2.47</b>             | <b>Fig S1F</b>                |
| <b>eIF2B-beta</b>    | <b>CG2677</b>  | <b>EIF2B2</b> | <b>AgaP_AGAP007097</b>    | <b>2.67</b>             | <b>Fig S1F</b>                |
| <b>eIF2B-epsilon</b> | <b>CG3806</b>  | <b>EIF2B5</b> | <b>ENSANGG00000017368</b> | <b>2.75</b>             |                               |
| <b>MED4</b>          | <b>CG8609</b>  | <b>MED4</b>   | <b>AgaP_AGAP004063</b>    | <b>2.65</b>             | <b>Fig S1F</b>                |

|               |                |              |                         |             |                |
|---------------|----------------|--------------|-------------------------|-------------|----------------|
| <b>MED7</b>   | <b>CG31390</b> | <b>MED7</b>  | <b>AgaP_AGAP002823</b>  | <b>2.50</b> | <b>Fig S1F</b> |
| <b>MED10</b>  | <b>CG5057</b>  | <b>MED10</b> | <b>AgaP_AGAP006248</b>  | <b>2.09</b> |                |
| <b>MED14</b>  | <b>CG12031</b> | <b>MED14</b> | <b>AgaP_AGAP005700</b>  | <b>3.11</b> |                |
| <b>MED17</b>  | <b>CG7957</b>  | <b>MED17</b> | <b>MED17_ANOGA</b>      | <b>2.49</b> |                |
| <b>MED22</b>  | <b>CG3034</b>  | <b>MED22</b> | <b>AgaP_AGAP004191</b>  | <b>2.31</b> |                |
| <b>Arpc3B</b> | <b>CG8936</b>  | <b>ARPC3</b> | <b>AgaP_AGAP001712</b>  | <b>2.52</b> |                |
| U26           | CG13401        | AASDH        | AgaP_AGAP010071         | -2.16       | -1.66          |
| maf-S         | CG9954         | MAFK         | AgaP_AGAP010405         | -2.17       | -1.41          |
| IntS12        | CG5491         | INTS12       | AgaP_AGAP004359         | -2.18       | -3.94          |
| Trn-SR        | CG2848         | TNPO3        | AgaP_AGAP003576         | -2.19       | -2.08          |
| Rab7          | CG5915         | RAB7A        | AgaP_AGAP001617         | -2.22       | -1.36          |
| CG6051        | CG6051         |              | AgaP_AGAP003678         | -2.22       | -1.51          |
| HdacX         | CG31119        | HDAC11       | AgaP_AGAP001736         | -2.30       | -4.47          |
| PGRP-SC1a/b   | CG14746        | PGLYRP1      | PGRPS3                  | -2.32       | -1.79          |
| br            | CG11491        |              | ENSANGG00000016940      | -2.33       | -2.59          |
| Cht9          | CG10531        |              | AgaP_AGAP004876         | -2.34       | -2.14          |
| CG11455       | CG11455        |              | AgaP_AGAP009824         | -2.37       | -3.24          |
| CG8237        | CG8237         | FAM8A1       | AgaP_AGAP011364         | -2.37       | -3.75          |
| chic          | CG9553         |              | AgaP_AGAP009861         | -2.41       | -1.90          |
| Ugt35a        | CG6644         | UGT1A4       |                         | -2.44       | -3.75          |
| CG9175        | CG9175         | PREB         | AgaP_AGAP009942         | -2.52       | -3.59          |
| NP15.6        | CG6008         |              | ENSANGG00000015418      | -2.63       | -3.27          |
| CG7219        | Spn28D         |              | SRPN4/5/6/16            | -2.64       | -2.82          |
| CG9311        | CG9311         | PTPN23       | AgaP_AGAP011586         | -2.67       | -2.00          |
| spen          | CG18497        | SPEN         |                         | -2.68       | -4.44          |
| VhaM8.9       | CG8444         | ATP6AP2      | AgaP_AGAP003430         | -2.69       | -1.45          |
| Bsg           | CG31605        |              | AgaP_AGAP008408         | -2.80       | -2.94          |
| PICK1         | CG6167         | PICK1        | AgaP_AGAP007832         | -2.83       | -3.21          |
| Kap-alpha3    | CG9423         | KPNA4        | AgaP_AGAP001273         | -2.87       | -2.89          |
| cos           | CG1708         | KIF7         | AgaP_ENSANGG00000016509 | -2.92       | -1.47          |
| CG2145        | CG2145         | P11          | AgaP_AGAP002925         | -2.96       | -2.11          |
| CG5284        | CG5284         | CLCN3        | AgaP_AGAP005777         | -3.06       | -2.87          |
| CG9911        | CG9911         | TXNDC4       | AgaP_AGAP000909         | -3.08       | -2.52          |
| CG31523       | CG31523        | ELOVL7       | AgaP_AGAP004372         | -3.18       | -1.48          |
| I(1)G0155     | CG1515         | YKT6         | AgaP_AGAP000392         | -3.20       | -3.08          |
| Herp          | CG14536        | HERPUD2      |                         | -3.21       | -4.24          |
| Tango5        | CG32675        | TMEM49       | AgaP_AGAP010304         | -3.21       | -3.01          |
| CG17766       | CG17766        | WDR7         | AgaP_AGAP008003         | -3.27       | -2.65          |
| CG3036        | CG3036         |              | AgaP_AGAP009498         | -3.36       | -4.19          |
| CG32276       | CG32276        | SERP2        | AgaP_AGAP001548         | -3.38       | -2.05          |
| CG11820       | CG11820        |              | AgaP_AGAP011757         | -3.38       | -4.14          |
| CG5021        | CG5021         | FAM18A       | AgaP_AGAP012432         | -3.41       | -7.26          |
| CG6995        | CG6995         | SLTM         | AgaP_AGAP001298         | -3.50       | -2.62          |
| Or94a         | CG17241        |              | GPROR34                 | -3.50       | -7.74          |
| CG6488        | CG6488         | COG8         | AgaP_AGAP011488         | -3.51       | -2.82          |
| Rab5          | CG3664         | RAB5C        | AgaP_AGAP007901         | -3.54       | -4.75          |
| CG5745        | CG5745         | TBC1D22B     | AgaP_AGAP004522         | -3.81       | -1.64          |
| CG7816        | CG7816         | SLC39A13     | AgaP_AGAP003300         | -3.84       | -1.75          |
| CG11134       | CG11134        | PTPN23       | AgaP_AGAP011586         | -3.86       | -2.79          |
| Chc           | CG9012         | CLTC         | AgaP_AGAP003021         | -4.01       | -2.63          |

|                  |                |                 |                        |               |                |
|------------------|----------------|-----------------|------------------------|---------------|----------------|
| vib              | CG5269         | PITPNA          | AgaP_AGAP001957        | -4.08         | -2.47          |
| Vps16A           | CG8454         | VPS16           | AgaP_AGAP000529        | -4.10         | -3.35          |
| CG7456           | CG7456         | COG4            | AgaP_AGAP008875        | -4.11         | -5.35          |
| Rack1            | CG7111         | GNB2L1          | AgaP_AGAP010173        | -4.16         | -3.66          |
| VhaSFD           | CG17332        | ATP6V1H         | AgaP_AGAP009486        | -4.22         | -3.41          |
| alpha-Est9       | CG1128         |                 | AgaP_AGAP006227        | -4.30         | -5.34          |
| lace             | CG4162         | SPTLC2          | AgaP_AGAP007941        | -4.40         | -4.36          |
| SNF1A            | CG3051         | PRKAA2          | AgaP_AGAP002686        | -4.42         | -5.43          |
| CG8176           | CG8176         | FCHO2           | AgaP_AGAP002024        | -4.42         | -1.72          |
| CG17328          | CG17328        |                 | AgaP_AGAP009130        | -4.45         | -1.62          |
| wmd              | CG3957         | STRAP           | AgaP_AGAP005029        | -4.56         | -3.40          |
| lwr              | CG3018         | UBE2I           | AgaP_AGAP011076        | -4.76         | -3.58          |
| Arp14D           | CG9901         | ACTR2           | AgaP_AGAP000985        | -4.76         | -5.48          |
| CG9773           | CG9773         | UNC50           | AgaP_AGAP002901        | -4.78         | -7.25          |
| CG3149           | CG3149         | RFT1            | AgaP_AGAP004419        | -5.04         | -2.85          |
| CG11963          | CG11963        | SUCLA2          | AgaP_AGAP004744        | -5.16         | -3.66          |
| CG4557           | CG4557         | TMF1            | AgaP_AGAP000660        | -5.30         | -2.19          |
| Bap              | CG12532        | AP1B1           |                        | -5.34         | -3.55          |
| Slh              | CG3539         | SCFD1           | AgaP_AGAP011358        | -5.47         | -1.56          |
| CG8029           | CG8029         |                 | AgaP_AGAP003879        | -5.48         | -5.15          |
| AP-50            | CG7057         | AP2M1           | AgaP_AGAP007131        | -5.58         | -3.64          |
| Syx5             | CG4214         | STX5            | AgaP_AGAP008756        | -5.60         | -2.40          |
| CG1868           | CG1868         |                 | AgaP_AGAP008973        | -5.63         | -3.37          |
| CG4645           | CG4645         | YIPF1           | AgaP_AGAP006951        | -5.68         | -3.17          |
| Spase25          | CG1751         | SPCS2           | AgaP_AGAP011842        | -5.82         | -3.97          |
| sec23            | CG1250         | SEC23A          | AgaP_AGAP001759        | -5.82         | -2.20          |
| Aats-arg         | CG9020         | RARS            | AgaP_AGAP004708-PA     | -6.09         | -1.60          |
| SrpRbeta         | CG33162        | SRPRB           | AgaP_AGAP006688        | -6.19         | -5.33          |
| shi              | CG18102        | DNM1            | AgaP_AGAP003018        | -6.26         | -2.50          |
| Vha26            | CG1088         | ATP6V1E1        | AgaP_AGAP002401        | -6.91         | -2.25          |
| Syx7             | CG5081         | STX7            | AgaP_AGAP005543        | -7.27         | -4.02          |
| CG40127          | CG40127        |                 | AgaP_AGAP006389        | -7.27         | -7.84          |
| CG2926           | CG2926         |                 | AgaP_AGAP010697        | -8.48         | -2.19          |
| Srp72            | CG5434         | SRP72           | AgaP_AGAP001939        | -8.75         | -5.21          |
| eIF-4E           | CG4035         |                 | AgaP_AGAP007172        | -9.63         | -4.32          |
| mr               | CG3060         | ANAPC2          | AgaP_AGAP005048        | -9.64         | -8.28          |
| Gtp-bp           | CG2522         | SRPR            | AgaP_AGAP010894        | -9.87         | -4.01          |
| CG4484           | CG4484         |                 | AgaP_AGAP010854        | -10.26        | -2.50          |
| <b>Vha100-1</b>  | <b>CG1709</b>  | <b>ATP6V0A1</b> | <b>AgaP_AGAP003711</b> | <b>-3.33</b>  |                |
| <b>Vha100-2</b>  | <b>CG18617</b> | <b>ATP6V0A4</b> | <b>AgaP_AGAP001587</b> | <b>-4.50</b>  |                |
| <b>Vha55</b>     | <b>CG17369</b> | <b>ATP6V1B2</b> | <b>AgaP_AGAP002884</b> | <b>-4.11</b>  | <b>Fig S1F</b> |
| <b>VhaPPA1-1</b> | <b>CG7007</b>  | <b>ATP6V0B</b>  | <b>AgaP_AGAP009334</b> | <b>-9.84</b>  |                |
| <b>VhaAC39</b>   | <b>CG2934</b>  | <b>ATP6V0D1</b> | <b>AgaP_AGAP000721</b> | <b>-5.51</b>  | <b>Fig S1F</b> |
| <b>Vha13</b>     | <b>CG6213</b>  | <b>ATP6V1G2</b> | <b>AgaP_AGAP001823</b> | <b>-5.02</b>  |                |
| <b>Vha14</b>     | <b>CG8210</b>  | <b>ATP6V1F</b>  | <b>AgaP_AGAP002473</b> | <b>-6.63</b>  |                |
| <b>Srp19</b>     | <b>CG4457</b>  | <b>SRP19</b>    | <b>AgaP_AGAP006895</b> | <b>-5.46</b>  | <b>Fig S1F</b> |
| <b>Srp54K</b>    | <b>CG4659</b>  | <b>SRP54</b>    | <b>AgaP_AGAP004610</b> | <b>-12.55</b> | <b>Fig S1F</b> |
| <b>Srp9</b>      | <b>CG8268</b>  |                 | <b>AgaP_AGAP007492</b> | <b>-4.80</b>  |                |
| <b>Srp14</b>     | <b>CG5417</b>  |                 | <b>AgaP_AGAP008339</b> | <b>-6.27</b>  |                |
| <b>Arp66B</b>    | <b>CG7558</b>  | <b>ACTR3</b>    | <b>AgaP_AGAP005110</b> | <b>-4.48</b>  |                |
| <b>eIF4G</b>     | <b>CG10811</b> | <b>EIF4G1</b>   | <b>AgaP_AGAP002502</b> | <b>-3.18</b>  | <b>Fig S1F</b> |
