# Supplementary material for: Genome-Wide RNAi Screen Identifies Broadly-Acting Host Factors That Inhibit Arbovirus Infection
Source: PubMed Central journal article supplement (PMC3923753; doi:10.1371/journal.ppat.1003914), 2014-02-13
Supplement: ppat.1003914.s003.pdf [file ppat.1003914.s003.pdf]

**Table S3. Genes that are antiviral against WNV were tested against a panel of arboviruses.**

| gene            | CG ID          | Human Homolog | Mosquito Ortholog         | Primary Avg z-score inf | WNV secondary Avg z-score inf | KUN Avg z-score inf | DEN Avg z-score inf | SIN Avg z-score inf | RVFV Avg z-score inf | VSV Avg z-score inf |
|-----------------|----------------|---------------|---------------------------|-------------------------|-------------------------------|---------------------|---------------------|---------------------|----------------------|---------------------|
| Aats-arg        | CG9020         | RARS          | AgaP_AGAP004708-PA        | -6.09                   | -1.60                         |                     |                     | 4.54                | -2.23                | -0.83               |
| <b>Aats-tyr</b> | <b>CG4561</b>  | <b>YARS</b>   | <b>AgaP_AGAP003003</b>    | <b>2.72</b>             | <b>1.88</b>                   | <b>1.85</b>         | <b>2.19</b>         | <b>1.33</b>         | <b>1.78</b>          | <b>1.85</b>         |
| alpha-Est9      | CG1128         |               | AgaP_AGAP006227           | -4.30                   | -5.34                         |                     |                     | 1.41                | -0.26                |                     |
| AP-50           | CG7057         | AP2M1         | AgaP_AGAP007131           | -5.58                   | -3.64                         |                     |                     | -3.09               | -2.80                | 2.25                |
| Arp14D          | CG9901         | ACTR2         | AgaP_AGAP000985           | -4.76                   | -5.48                         | 0.68                | -3.62               | 0.38                | -2.21                |                     |
| Axn             | CG7926         | AXIN2         | AgaP_AGAP002123           | 2.24                    | 3.12                          | 1.20                | -1.23               | 1.40                | -0.06                | -0.69               |
| Bap             | CG12532        | AP1B1         |                           | -5.34                   | -3.55                         |                     |                     | -1.97               | -2.68                | 1.96                |
| br              | CG11491        |               | ENSANGG00000016940        | -2.33                   | -2.59                         | -0.25               | -0.16               | 1.26                | -0.55                | 0.53                |
| Bsg             | CG31605        |               | AgaP_AGAP008408           | -2.80                   | -2.94                         | 1.94                | 1.51                | 0.60                | -0.21                | 1.60                |
| CG10158         | CG10158        | FGFR10P2      | AgaP_AGAP012118           | 2.40                    | 2.81                          | 2.11                | 1.50                | 0.62                | 1.51                 |                     |
| CG10646         | CG10646        | TSSC1         | AgaP_AGAP004339           | 2.32                    | 2.09                          | 0.10                | 1.44                | 2.07                | -0.08                | 0.90                |
| CG11134         | CG11134        | PTPN23        | AgaP_AGAP011586           | -3.86                   | -2.79                         | -0.69               | 0.02                | -2.38               | 0.36                 | -0.36               |
| CG11455         | CG11455        |               | AgaP_AGAP009824           | -2.37                   | -3.24                         | 0.68                | 0.71                | 0.02                | 0.69                 | 1.99                |
| CG11526         | CG11526        | FAM40A        | AgaP_AGAP007902           | 2.32                    | 4.07                          | 4.13                | 2.42                | 0.74                | 0.35                 | -1.15               |
| CG11820         | CG11820        |               | AgaP_AGAP011757           | -3.38                   | -4.14                         | 0.64                | 1.23                | 0.58                | -0.03                | -1.16               |
| CG11837         | CG11837        | DIMT1L        | AgaP_AGAP004465           | 2.14                    | 1.58                          | -0.08               | -0.01               | -0.36               | -0.33                | 0.38                |
| CG11920         | CG11920        | IMP4          | AgaP_AGAP003890           | 2.15                    | 3.23                          | 2.34                | 0.39                | 2.00                | 0.95                 | 0.52                |
| CG11963         | CG11963        | SUCLA2        | AgaP_AGAP004744           | -5.16                   | -3.66                         | 0.64                | 0.49                | -2.54               | 0.04                 | 0.54                |
| CG14516         | CG14516        |               | AgaP_ENSANGG00000018759   | 2.60                    | 2.49                          | 0.51                | 0.15                | 1.70                | 0.01                 | -0.57               |
| <b>CG17119</b>  | <b>CG17119</b> | <b>CTNS</b>   | <b>AgaP_AGAP004115</b>    | <b>2.50</b>             | <b>2.86</b>                   | <b>2.87</b>         | <b>2.99</b>         | <b>1.38</b>         | <b>1.96</b>          | <b>3.84</b>         |
| CG17328         | CG17328        |               | AgaP_AGAP009130           | -4.45                   | -1.62                         | -0.05               | 0.36                | 0.78                | -0.28                | -0.51               |
| <b>CG17737</b>  | <b>CG17737</b> | <b>EIF1</b>   | <b>AgaP_AGAP006459</b>    | <b>3.15</b>             | <b>4.57</b>                   | <b>3.46</b>         | <b>2.93</b>         | <b>2.46</b>         | <b>1.79</b>          | <b>2.27</b>         |
| CG17766         | CG17766        | WDR7          | AgaP_AGAP008003           | -3.27                   | -2.65                         |                     |                     | -2.97               | -2.42                | -0.36               |
| CG1789          | CG1789         | UTP11L        | AgaP_AGAP004336           | 2.71                    | 3.11                          | 1.59                | 0.11                | 3.07                | 0.73                 | -1.58               |
| CG1868          | CG1868         |               | AgaP_AGAP008973           | -5.63                   | -3.37                         | 0.93                | -1.82               | -0.77               | -0.33                | -0.48               |
| CG2145          | CG2145         | P11           | AgaP_AGAP002925           | -2.96                   | -2.11                         | 0.36                | 0.50                | 1.52                | 0.02                 | -0.11               |
| CG2926          | CG2926         |               | AgaP_AGAP010697           | -8.48                   | -2.19                         |                     |                     | -8.06               | 0.51                 | 2.64                |
| CG3036          | CG3036         |               | AgaP_AGAP009498           | -3.36                   | -4.19                         | 0.57                | -2.01               | 1.78                | 0.13                 | -0.01               |
| CG3149          | CG3149         | RFT1          | AgaP_AGAP004419           | -5.04                   | -2.85                         | 0.11                | 1.50                | -0.80               | -0.43                | -0.18               |
| CG31523         | CG31523        | ELOVL7        | AgaP_AGAP004372           | -3.18                   | -1.48                         | -0.07               | 0.81                | -1.21               | -0.27                | 0.38                |
| CG32113         | CG32113        | VPS13D        | AgaP_AGAP009780           | 2.98                    | 2.34                          | 2.05                | -0.75               | 1.33                | -0.09                | 0.53                |
| CG3224          | CG3224         | ZNF593        | AgaP_AGAP003698           | 2.52                    | 1.76                          | 2.03                | -0.02               | 2.36                | 2.19                 | 2.55                |
| CG32276         | CG32276        | SERP2         | AgaP_AGAP001548           | -3.38                   | -2.05                         | -0.98               | 0.43                | 0.94                | -0.54                | 0.19                |
| CG33123         | CG33123        | LARS          | AgaP_AGAP008297           | 2.73                    | 2.77                          | 2.34                | -0.44               | 1.73                | -0.48                | 0.71                |
| CG3335          | CG3335         | RBM19         | AgaP_AGAP005249           | 2.34                    | 3.13                          | 2.15                | 0.70                | 2.47                | 1.29                 | 0.30                |
| CG3876          | CG3876         | FRAG1         | AgaP_AGAP007869           | 2.45                    | 1.67                          | -0.62               | 1.39                | -0.49               | 0.09                 | 0.09                |
| CG40127         | CG40127        |               | AgaP_AGAP006389           | -7.27                   | -7.84                         | -1.01               | -4.40               | -2.28               | -2.89                |                     |
| CG4484          | CG4484         |               | AgaP_AGAP010854           | -10.26                  | -2.50                         | 0.80                | -2.08               | 1.23                | -0.16                | 0.35                |
| CG4557          | CG4557         | TMF1          | AgaP_AGAP000660           | -5.30                   | -2.19                         |                     |                     | -2.19               | -1.15                | 0.77                |
| CG4645          | CG4645         | YIPF1         | AgaP_AGAP006951           | -5.68                   | -3.17                         | -0.68               | -0.73               | 0.69                | 0.01                 | 0.74                |
| CG5021          | CG5021         | FAM18A        | AgaP_AGAP012432           | -3.41                   | -7.26                         | 0.01                | -1.07               | -0.32               | -0.12                | -0.47               |
| CG5284          | CG5284         | CLCN3         | AgaP_AGAP005777           | -3.06                   | -2.87                         |                     |                     | -9.84               | -4.97                | -2.82               |
| CG5326          | CG5326         |               | AgaP_AGAP011812           | 2.31                    | 3.56                          | 1.70                | 0.69                | 0.12                | 0.23                 | -1.02               |
| CG5745          | CG5745         | TBC1D22B      | AgaP_AGAP004522           | -3.81                   | -1.64                         | 0.06                | 0.87                | 0.83                | 0.17                 | -0.12               |
| CG6051          | CG6051         |               | AgaP_AGAP003678           | -2.22                   | -1.51                         | 0.47                | 0.57                | -0.01               | -0.21                |                     |
| <b>CG6094</b>   | <b>CG6094</b>  | <b>ICT1</b>   | <b>AgaP_AGAP008425</b>    | <b>2.29</b>             | <b>2.76</b>                   | <b>2.87</b>         | <b>1.89</b>         | <b>1.33</b>         | <b>2.06</b>          | <b>2.56</b>         |
| CG6488          | CG6488         | COG8          | AgaP_AGAP011488           | -3.51                   | -2.82                         | -0.63               | 1.20                | -0.98               | 0.55                 | 0.54                |
| CG6495          | CG6495         |               | AgaP_AGAP007887           | 2.37                    | 1.97                          | -0.02               | -0.73               | 0.88                | 0.58                 | -0.26               |
| CG6995          | CG6995         | SLTM          | AgaP_AGAP001298           | -3.50                   | -2.62                         |                     |                     | -5.82               | 2.66                 | 3.00                |
| <b>CG7115</b>   | <b>CG7115</b>  | <b>PPM1L</b>  | <b>ENSANGG00000018281</b> | <b>2.08</b>             | <b>3.23</b>                   | <b>2.37</b>         | <b>1.40</b>         | <b>1.88</b>         | <b>1.63</b>          | <b>2.30</b>         |
| CG7219          | Spn28D         |               | SRPN4/5/6/16              | -2.64                   | -2.82                         | 0.25                | -0.63               | -0.77               | -1.14                | 0.48                |
| CG7394          | CG7394         | DNAJC19       | AgaP_AGAP003533           | 2.51                    | 2.14                          | 2.99                | -0.92               | 1.75                | 1.65                 |                     |
| CG7456          | CG7456         | COG4          | AgaP_AGAP008875           | -4.11                   | -5.35                         | 0.09                | -0.30               | -2.23               | 2.23                 | 0.34                |
| CG7816          | CG7816         | SLC39A13      | AgaP_AGAP003300           | -3.84                   | -1.75                         | 0.45                | 0.62                | 1.38                | 0.35                 | 0.52                |
| CG8029          | CG8029         |               | AgaP_AGAP003879           | -5.48                   | -5.15                         | -1.55               | -5.41               | -2.22               | -2.78                | -4.67               |
| CG8176          | CG8176         | FCHO2         | AgaP_AGAP002024           | -4.42                   | -1.72                         | -0.24               | -2.32               | -0.64               | -0.70                | -0.60               |
| CG8237          | CG8237         | FAM8A1        | AgaP_AGAP011364           | -2.37                   | -3.75                         | -0.34               | 0.42                | 0.14                | -0.46                | -0.53               |
| VhaM8.9         | CG8444         | ATP6AP2       | AgaP_AGAP003430           | -2.69                   | -1.45                         |                     |                     | -2.83               | -2.07                | 1.11                |
| CG9053          | CG9053         | TMED5         | AgaP_AGAP001505           | 2.49                    | 3.02                          | 2.43                | 2.32                | 2.33                | 0.94                 | 1.40                |
| CG9175          | CG9175         | PREB          | AgaP_AGAP009942           | -2.52                   | -3.59                         | 0.24                | 0.77                | 0.40                | 1.19                 | -0.98               |
| CG9311          | CG9311         | PTPN23        | AgaP_AGAP011586           | -2.67                   | -2.00                         |                     |                     | -1.40               | -0.83                | 1.01                |
| CG9773          | CG9773         | UNC50         | AgaP_AGAP002901           | -4.78                   | -7.25                         | -0.81               | -0.14               | -3.54               | 0.98                 | 1.13                |
| CG9911          | CG9911         | TXNDC4        | AgaP_AGAP000909           | -3.08                   | -2.52                         | -0.53               | -1.83               | -0.28               | -0.12                | -2.48               |
| Chc             | CG9012         | CLTC          | AgaP_AGAP003021           | -4.01                   | -2.63                         |                     |                     | -5.32               | -1.72                | 1.80                |
| chic            | CG9553         |               | AgaP_AGAP009861           | -2.41                   | -1.90                         | 0.13                | -0.84               | 1.00                | -0.26                | 0.64                |
| Cht9            | CG10531        |               | AgaP_AGAP004876           | -2.34                   | -2.14                         | -0.79               | 0.98                | -2.12               | -0.01                | 0.14                |
| cn              | CG1555         | KMO           | KMO_ANOGA                 | 2.35                    | 1.71                          |                     |                     | 4.21                | -1.17                | 1.17                |
| cnk             | CG6556         |               | AgaP_AGAP009167           | 2.12                    | 2.25                          | 2.13                | 1.40                | 0.41                | -1.17                | -2.77               |

|                     |                |               |                           |             |             |             |             |             |             |             |
|---------------------|----------------|---------------|---------------------------|-------------|-------------|-------------|-------------|-------------|-------------|-------------|
| cos                 | CG1708         | KIF7          | AgaP_ENSANGG00000016509   | -2.92       | -1.47       | 0.46        | -1.72       | 1.19        | -0.72       |             |
| CrebA               | CG7450         |               | AgaP_AGAP011038           | 2.84        | 1.37        | 0.12        | -0.97       | -0.17       | -0.49       | -0.09       |
| eIF-4E              | CG4035         |               | AgaP_AGAP007172           | -9.63       | -4.32       |             |             | -1.52       | -2.68       | -2.18       |
| eIF2B-gamma         | CG8190         | EIF2B3        | AgaP_AGAP005210           | 2.06        | 2.03        |             |             | 5.31        | 3.10        | 2.44        |
| <b>emb</b>          | <b>CG13387</b> | <b>XPO1</b>   | <b>AgaP_AGAP009929</b>    | <b>2.17</b> | <b>2.90</b> | <b>3.14</b> | <b>3.16</b> | <b>2.68</b> | <b>2.39</b> | <b>3.73</b> |
| Gtp-bp              | CG2522         | SRPR          | AgaP_AGAP010894           | -9.87       | -4.01       | -0.75       | -5.97       | -1.53       | 0.51        | -2.17       |
| HdacX               | CG31119        | HDAC11        | AgaP_AGAP001736           | -2.30       | -4.47       | -0.54       | 0.42        | 0.19        | -0.42       | -1.88       |
| Herp                | CG14536        | HERPUD2       |                           | -3.21       | -4.24       | -0.03       | -1.69       | 1.53        | -0.01       | -0.41       |
| IntS12              | CG5491         | INTS12        | AgaP_AGAP004359           | -2.18       | -3.94       | 0.06        | -0.75       | -0.70       | -0.29       | 0.10        |
| Kap-alpha3          | CG9423         | KPNA4         | AgaP_AGAP001273           | -2.87       | -2.89       | 0.02        | -2.21       | -0.59       | 0.21        |             |
| l(1)G0155           | CG1515         | YKT6          | AgaP_AGAP000392           | -3.20       | -3.08       | -0.68       | -0.58       | -0.64       | -0.73       | 0.67        |
| l(2)k07824          | CG7989         | UTP18         | AgaP_AGAP009046           | 2.14        | 3.73        | 1.86        | 1.43        | 2.63        | 1.34        | 0.51        |
| lace                | CG4162         | SPTLC2        | AgaP_AGAP007941           | -4.40       | -4.36       |             |             | -7.23       | -0.78       | 1.47        |
| lwr                 | CG3018         | UBE2I         | AgaP_AGAP011076           | -4.76       | -3.58       | 0.20        | -0.42       | 0.84        | 0.56        |             |
| maf-S               | CG9954         | MAFK          | AgaP_AGAP010405           | -2.17       | -1.41       | -0.90       | -0.38       | -0.32       | -0.69       | -0.70       |
| MED8                | CG13867        | MED8          | AgaP_AGAP005909           | 2.49        | 2.23        | 1.70        | 1.74        | 3.25        | 1.46        | 0.66        |
| mr                  | CG3060         | ANAPC2        | AgaP_AGAP005048           | -9.64       | -8.28       | 0.08        | 1.45        | 0.31        | 0.83        | 0.79        |
| NP15.6              | CG6008         |               | ENSANGG00000015418        | -2.63       | -3.27       | 0.81        | 0.07        | 0.68        | 1.29        | 2.00        |
| Or94a               | CG17241        |               | GPROR34                   | -3.50       | -7.74       | -0.77       | 0.29        | -0.44       | 0.01        | -0.01       |
| PGRP-SC1a/b         | CG14746        | PGLYRP1       | PGRPS3                    | -2.32       | -1.79       | 0.26        | -0.16       | 0.98        | -0.43       | 0.20        |
| phl                 | CG2845         | BRAF          | AgaP_AGAP004699           | 2.38        | 2.27        | 1.77        | 1.41        | -0.53       | 0.62        | 1.29        |
| PICK1               | CG6167         | PICK1         | AgaP_AGAP007832           | -2.83       | -3.21       | 1.23        | 0.49        | 1.35        | -0.88       | -0.01       |
| <b>pont</b>         | <b>CG4003</b>  | <b>RUVBL1</b> | <b>ENSANGG00000022263</b> | <b>2.62</b> | <b>2.53</b> | <b>2.55</b> | <b>3.21</b> | <b>2.91</b> | <b>2.21</b> | <b>2.96</b> |
| PPP4R2r             | CG2890         | PPP4R2        | ENSANGG00000019508        | 2.55        | 2.41        | 2.53        | 2.77        | 1.55        | 1.61        | 1.25        |
| Rab-RP3             | CG7062         | RAB43         | AgaP_AGAP007096           | 2.35        | 2.83        | 0.16        | 0.46        | 0.10        | 0.22        | -0.43       |
| Rab5                | CG3664         | RAB5C         | AgaP_AGAP007901           | -3.54       | -4.75       |             |             | -9.26       | -3.67       | 0.12        |
| Rab7                | CG5915         | RAB7A         | AgaP_AGAP001617           | -2.22       | -1.36       |             |             | -3.60       | -2.16       | 0.93        |
| Rack1               | CG7111         | GNB2L1        | AgaP_AGAP010173           | -4.16       | -3.66       | -0.14       | -0.86       | 1.10        | -0.42       | 0.18        |
| sec23               | CG1250         | SEC23A        | AgaP_AGAP001759           | -5.82       | -2.20       |             |             | -3.68       | 1.12        | 2.56        |
| shi                 | CG18102        | DNM1          | AgaP_AGAP003018           | -6.26       | -2.50       |             |             | -2.57       | -1.49       | 0.97        |
| skd                 | CG9936         | MED13L        | AgaP_AGAP006436           | 2.86        | 3.07        | 3.16        | 0.55        | 1.50        | 0.59        |             |
| skpA                | CG16983        | LOC100506333  | AgaP_AGAP008719           | 2.74        | 1.44        |             |             | -0.24       | -0.12       | -0.13       |
| Slh                 | CG3539         | SCFD1         | AgaP_AGAP011358           | -5.47       | -1.56       |             |             | -6.95       | 2.46        | 1.37        |
| SNF1A               | CG3051         | PRKAA2        | AgaP_AGAP002686           | -4.42       | -5.43       |             |             | -8.04       | -0.50       | -2.62       |
| Spase25             | CG1751         | SPCS2         | AgaP_AGAP011842           | -5.82       | -3.97       | -0.26       | -6.63       | 1.11        | -0.26       | 0.95        |
| spen                | CG18497        | SPEN          |                           | -2.68       | -4.44       | -0.76       | 0.50        | 0.54        | -0.57       | 0.31        |
| Spt20               | CG17689        |               | AgaP_AGAP012403           | 2.23        | 2.64        | 2.80        | 0.03        | 0.84        | 0.24        | 0.23        |
| Srp72               | CG5434         | SRP72         | AgaP_AGAP001939           | -8.75       | -5.21       | -2.59       | -5.64       | -2.39       | 0.66        | -1.93       |
| SrpRbeta            | CG33162        | SRPRB         | AgaP_AGAP006688           | -6.19       | -5.33       | -1.42       | -4.02       | 0.24        | 1.00        | -1.17       |
| Syx5                | CG4214         | STX5          | AgaP_AGAP008756           | -5.60       | -2.40       |             |             | -4.95       | 0.81        | 0.81        |
| Syx7                | CG5081         | STX7          | AgaP_AGAP005543           | -7.27       | -4.02       | -0.77       | -1.86       | -5.03       | -4.64       | -0.67       |
| Taf5                | CG7704         | TAF5          | AgaP_AGAP011678           | 2.30        | 3.38        | 3.08        | 2.52        | 2.55        | 1.04        | 0.97        |
| Taf6                | CG32211        | TAF6          | AgaP_AGAP004254           | 3.08        | 2.94        | 2.63        | 2.04        | 2.41        | 0.63        | 0.76        |
| Tango5              | CG32675        | TMEM49        | AgaP_AGAP010304           | -3.21       | -3.01       | -0.26       | -6.41       | -2.28       | 0.69        | 0.69        |
| Trn-SR              | CG2848         | TNPO3         | AgaP_AGAP003576           | -2.19       | -2.08       | -0.48       | 0.35        | 0.98        | -0.01       | 0.57        |
| U26                 | CG13401        | AASDH         | AgaP_AGAP010071           | -2.16       | -1.66       | -0.49       | -0.22       | -0.32       | 0.06        | -4.18       |
| Ugt35a              | CG6644         | UGT1A4        |                           | -2.44       | -3.75       | -0.02       | -1.36       | 1.28        | -0.69       | -0.34       |
| Vha26               | CG1088         | ATP6V1E1      | AgaP_AGAP002401           | -6.91       | -2.25       |             |             | -1.56       | -0.09       | -0.17       |
| VhaSFD              | CG17332        | ATP6V1H       | AgaP_AGAP009486           | -4.22       | -3.41       |             |             | -4.27       | -1.93       | -0.36       |
| vib                 | CG5269         | PITPNA        | AgaP_AGAP001957           | -4.08       | -2.47       |             |             | -4.98       | -1.76       | -0.81       |
| Vps16A              | CG8454         | VPS16         | AgaP_AGAP000529           | -4.10       | -3.35       | -2.10       | -2.49       | -2.17       | -1.78       | -0.65       |
| wmd                 | CG3957         | STRAP         | AgaP_AGAP005029           | -4.56       | -3.40       | -1.60       | -0.09       | -0.10       | -0.21       | -0.06       |
| yellow-c   l(2)35Bg | CG4182         |               | AgaP_AGAP010280           | 2.85        | 2.18        | 2.21        | 0.86        | 1.01        | 0.43        | -0.24       |
