# Supplementary material for: Genome-Wide RNAi Screen Identifies Broadly-Acting Host Factors That Inhibit Arbovirus Infection
Source: PubMed Central journal article supplement (PMC3923753; doi:10.1371/journal.ppat.1003914), 2014-02-13
Supplement: ppat.1003914.s004.pdf [file ppat.1003914.s004.pdf]

TABLE S4: List of VRFs identified in other screens.  
Genes in red have Drosophila orthologs.

| Li ISG   | Schoggins ISG | Li HCV   | Krishnan WNV |
|----------|---------------|----------|--------------|
| ACSL4    | APOL2         | ARHGEF7  | ACRC         |
| AKAP8    | BCL2L14       | ATP11A   | AMELY        |
| ATF3     | C15orf48      | C16orf59 | ANP32B       |
| ATL1     | C22orf28      | CACNA1F  | ATCAY        |
| CDKN1A   | C5orf39       | COTL1    | DEFA3        |
| CXCR4    | C6orf150      | CSF3R    | DHRS10       |
| DDX24    | CCDC109B      | EMID2    | DOCK4        |
| EIF2AK2  | CCL2          | GKN2     | FAM106A      |
| GBP2     | CCL8          | HNRNPK   | FKBP1B       |
| GBP3     | CD9           | IGFBP6   | IRF3         |
| GNB4     | CXCL11        | IL17RB   | KBTBD8       |
| GPR126   | DDX58         | IMPDH1   | KIAA0753     |
| HRASLS2  | ETV6          | KCNA1    | LPGAT1       |
| HTR1D    | FBXO6         | KCNQ4    | MSMB         |
| ICAM1    | GCH1          | MTMR10   | NFS1         |
| IFI44L   | GJA4          | OTUB1    | NPIP         |
| IFI6     | GK            | PRPF31   | NPM3         |
| IFIT3    | GZMB          | PTPRH    | SCGB2A1      |
| IFITM2   | HPSE          | SEPT9    | SERPINB7     |
| IFRD1    | HSH2D         | SNRNP35  | SLC16A4      |
| IL13RA1  | IFI16         | TMPRSS12 | SPTBN4       |
| IL4I1    | IFI6          | TNFRSF18 | TMEM146      |
| IRF1     | IFIH1         | TSSK3    |              |
| IRF9     | IFIT5         | UBE2J2   |              |
| JAK2     | IFITM3        | USP43    |              |
| KBTBD8   | IRF1          |          |              |
| KLK8     | IRF2          |          |              |
| LPGAT1   | IRF7          |          |              |
| MAFK     | LRG1          |          |              |
| NUB1     | MAB21L2       |          |              |
| PAK3     | MKX           |          |              |
| PSMB9    | P2RY6         |          |              |
| RGS22    | PBEF1         |          |              |
| RNASE6   | PHF15         |          |              |
| SAMD9    | PI4K2B        |          |              |
| SAMD9L   | PLSCR1        |          |              |
| SAMHD1   | RTP4          |          |              |
| SC4MOL   | SAA1          |          |              |
| SEMA6D   | SLC1A1        |          |              |
| SERPINB7 | SLFN5         |          |              |
| STAT2    | TNFAIP6       |          |              |
| TLR3     | TNFRSF10A     |          |              |
| TNFSF10  | TNFSF13B      |          |              |
| TNFSF13B | TREX1         |          |              |
| TRIM21   | TRIM25        |          |              |
| TRIM6    | UNC93B        |          |              |
| VISA     | ZBP1          |          |              |
